# Supplementary material for: Domain Localization by Graphene Oxide in Supported Lipid Bilayers
Source: MDPI journal article supplement (doi:10.3390/ijms24097999), 2023-04-28
Supplement: s1 [file s1]

# Domain Localization by Graphene Oxide in Supported Lipid Bilayers

Ryugo Tero \*, Yoshi Hagiwara and Shun Saito

Department of Applied Chemistry and Life Science, Toyohashi University of Technology, Toyohashi 441-8580, Japan

\* Correspondence: tero@tut.jp

## Fluorescence images of DOPC+DPPC-SLB on SiO<sub>2</sub>/Si prepared with various cooling rate

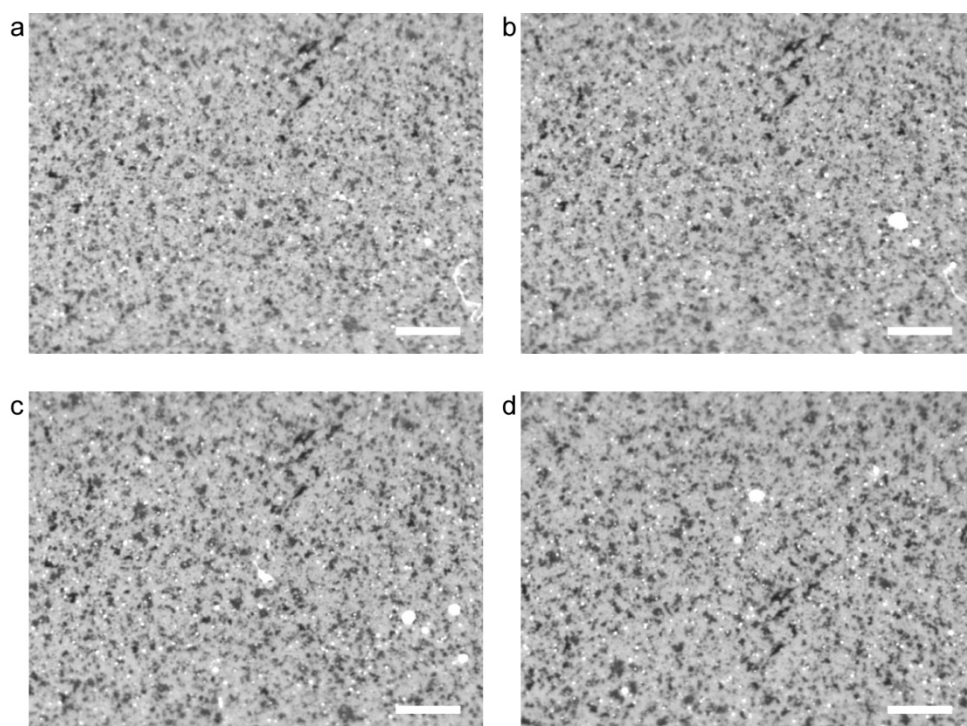

**Figure S1.** Fluorescence images of DOPC+DPPC-SLB on the SiO<sub>2</sub>/Si substrate without GO cooled from 45 °C to 25 °C at various colling rates: (a) 20.0 °C/min (corresponding to Figure 1a in the main text), (b) 5.0 °C/min, (c) 1.0 °C/min and (d) 0.5 °C/min. The sample was kept at 45 °C for 30 min during the cycle of heating and cooling. Scale bar = 20 μm.

---
